# Supplementary material for: Effect of poly[oligo(ethylene glycol) methyl ether methacrylate] side chain length on the brush swelling behavior in A/B/A–B ternary blends with polystyrene
Source: Royal Society of Chemistry journal article supplement (doi:10.1039/d3sm00151b), 2023-01-01
Supplement: d3sm00151b1.pdf [file d3sm00151b1.pdf]

## Supporting Information

Effect of poly[oligo(ethylene glycol) methyl ether methacrylate] side chain length  
on the swelling behavior in A/B/A-B ternary blends with polystyrene

Caini Zheng,<sup>1</sup> Bo Zhang,<sup>2</sup> Frank S. Bates,<sup>2,\*</sup> Timothy P. Lodge<sup>1,2,\*</sup>

<sup>1</sup>Department of Chemistry and <sup>2</sup>Department of Chemical Engineering and Materials Science,  
University of Minnesota, Minneapolis, MN 55455

\*Authors for correspondence: [bates001@umn.edu](mailto:bates001@umn.edu), [lodge@umn.edu](mailto:lodge@umn.edu)

**Materials** Poly[oligo(ethylene glycol) methyl ether methacrylate]-*b*-polystyrene diblock copolymers (POEGMA<sub>x</sub>-PS) are synthesized using reversible addition-fragmentation chain transfer polymerization (RAFT) as in our previous work.<sup>1</sup> Polystyrene was purchased from Scientific Polymer Products and used as received.

### **Synthesis of POEGMA<sub>x</sub> homopolymers**

Synthesis of POEGMA homopolymers involved RAFT polymerization, followed by end-group removal. For POEGMA with different side chains, the synthesis only differs in the monomers employed. Here, we describe the synthesis of POEGMA<sub>1</sub> as an example. First, monomer 2-methoxyethyl methacrylate (8.00 g, 5.5 mmol) was mixed with the chain transfer agent (CTA) 4-cyano-4-(dodecylsulfanylthiocarbonyl)sulfanyl pentanoic acid (0.81 g, 2.0 mmol) and azobisisobutyronitrile (AIBN) (0.033 g, 0.2 mmol) in a 100 mL round-bottom flask. After the addition of dioxane (24 mL), the flask was sealed by with a septum and purged under argon for 40 min. The mixture was then heated to 70 °C and left to react for 16 h. After quenching in liquid N<sub>2</sub>, the product was purified 3 times by precipitating in hexane. The purified homopolymers (2.5 g) were then mixed with AIBN (0.32 g, 1.9 mmol) and dissolved in 100 mL dioxane in a sealed 250 mL round-bottom flask. Following a 1 h purge under argon, tributyltin hydride (6.5 g, 2.2 mmol) was added to the mixture by a syringe. The reaction was then conducted at 70 °C for 2.5 h and the yellow color of the solution faded in 30 min. The resulting POEGMA<sub>1</sub> was purified by precipitation in hexane 3 times then freeze-dried in benzene overnight.

**Supplementary Table and Figures**  
**Nuclear magnetic resonance (NMR) spectroscopy**

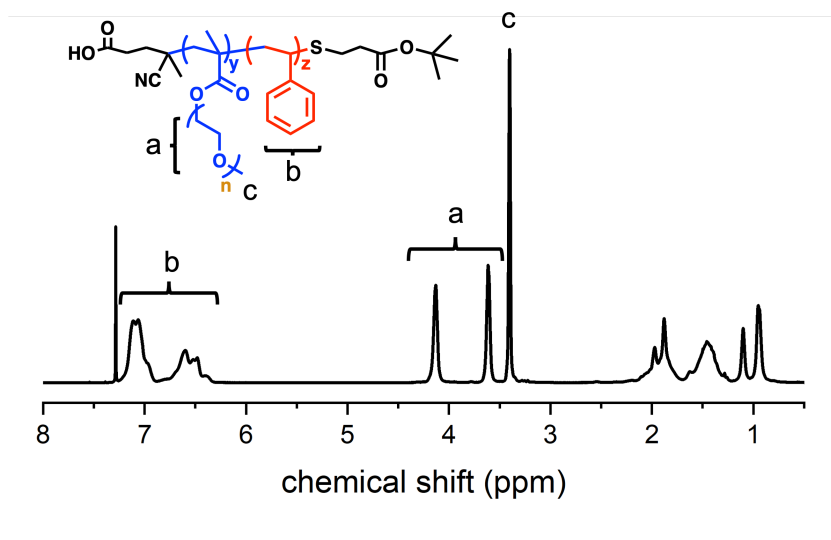

Figure S1.  $^1\text{H-NMR}$  spectrum for POEGMA<sub>1</sub>-PS in  $\text{CDCl}_3$ .

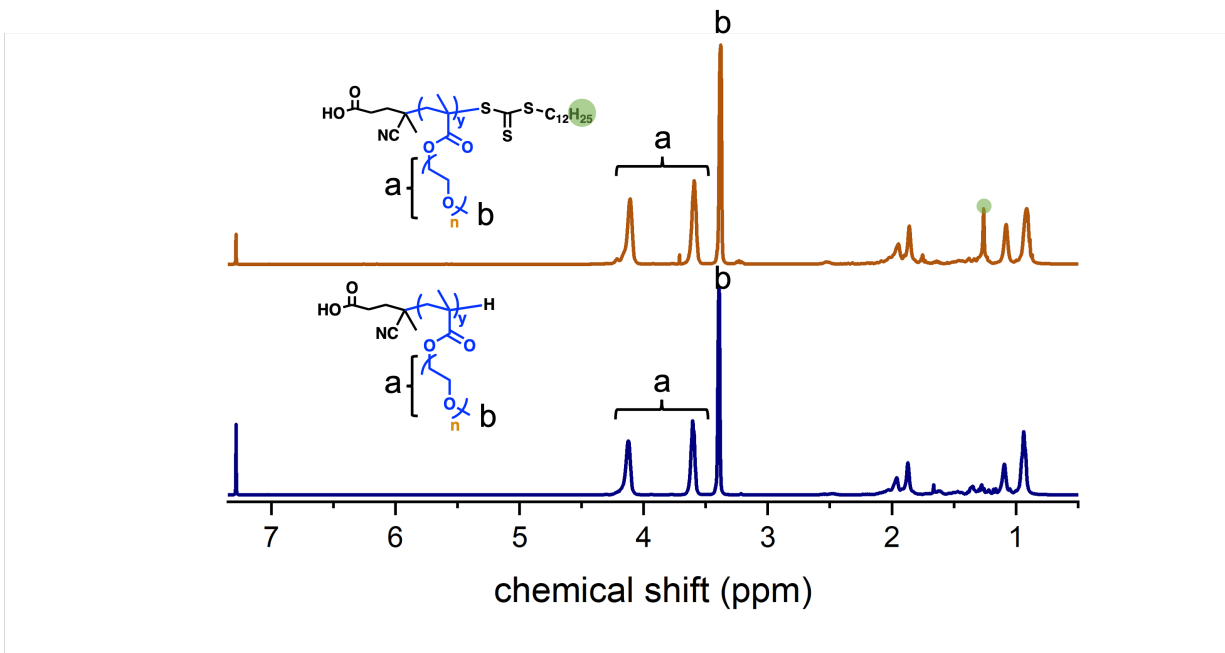

Figure S2.  $^1\text{H-NMR}$  spectrum for POEGMA<sub>1</sub> in  $\text{CDCl}_3$  before and after end group removal.

## Size exclusion chromatography (SEC)

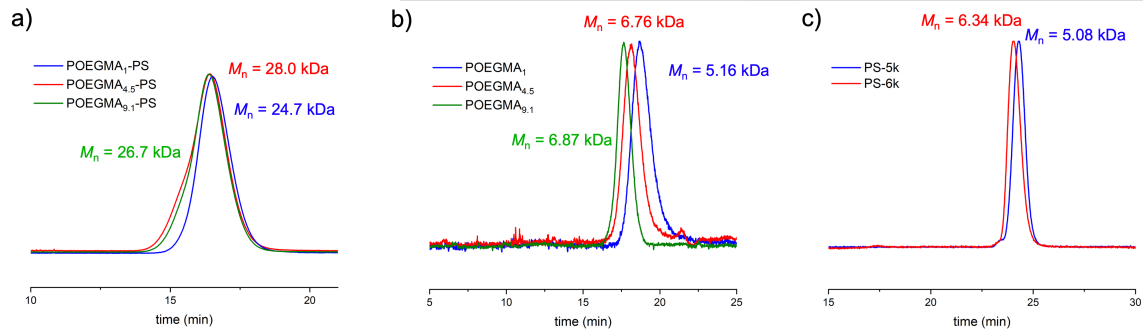

Figure S3. SEC LS traces for a) POEGMA<sub>x</sub>-PS block polymers, b) POEGMA<sub>x</sub> homopolymers, c) polystyrene homopolymers.

## Small-angle X-ray scattering (SAXS) patterns

### POEGMA<sub>1</sub>-PS/POEGMA<sub>1</sub>/PS (T1)

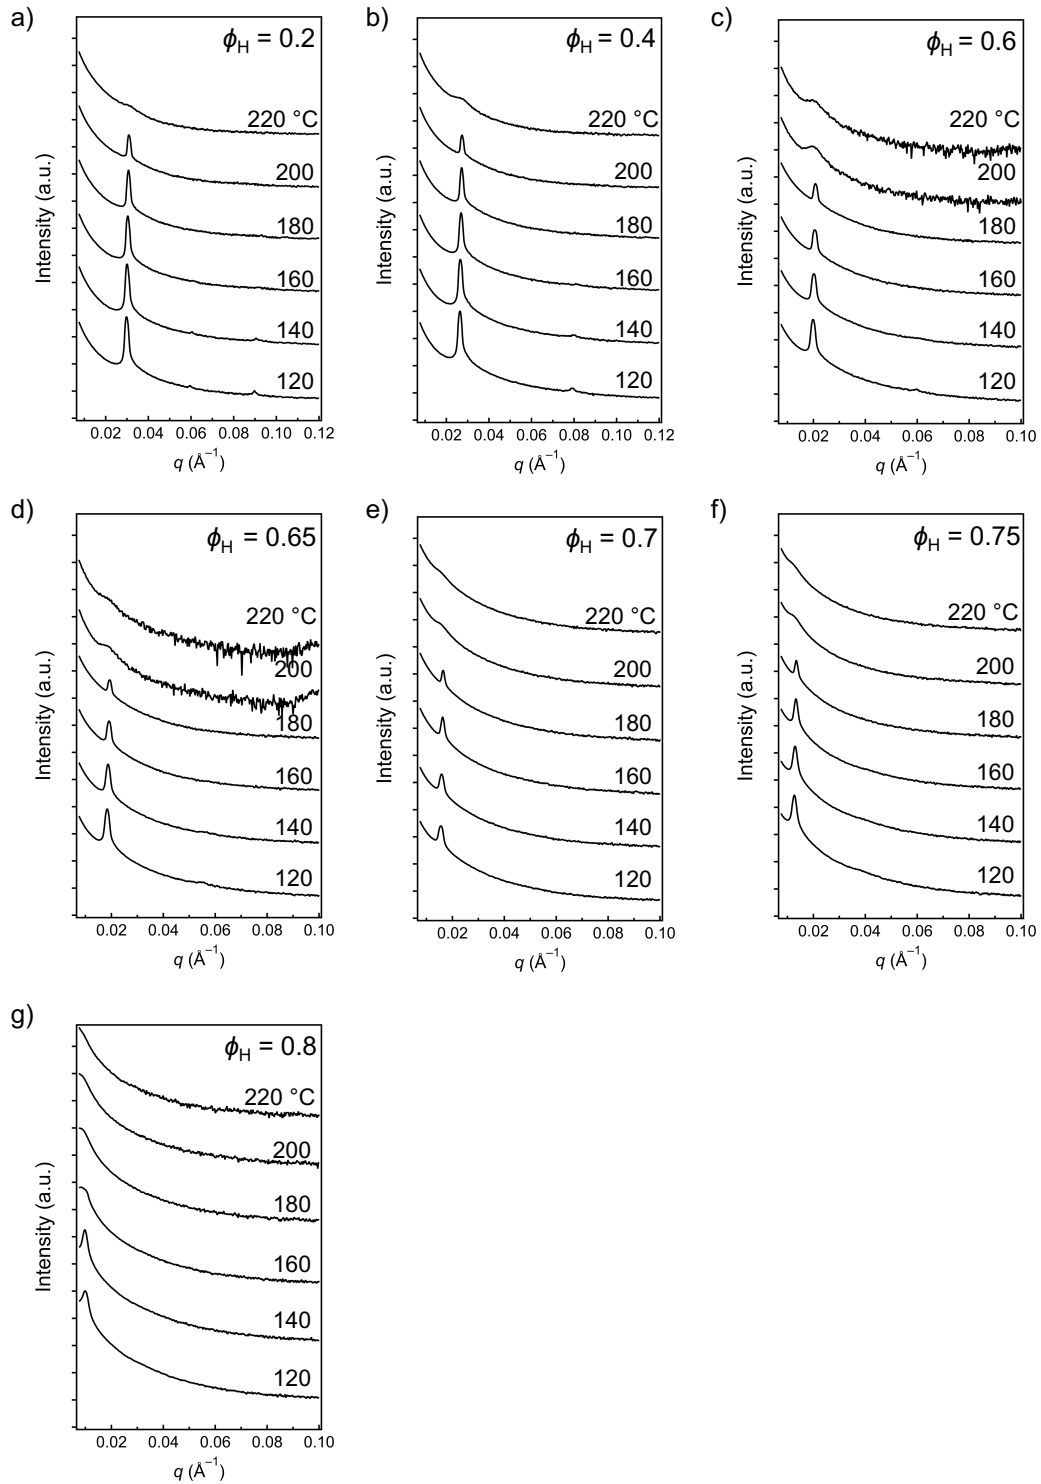

Figure S4. Scattering patterns for T1 at 120, 140, 160, 180, 200 and 220 °C along the volumetrically symmetric isopleth ( $\phi_{\text{POEGMA1}} / \phi_{\text{PS}} = 1$ ) at different compositions.

### POEGMA<sub>4.5</sub>-PS/POEGMA<sub>4.5</sub>/PS (T2)

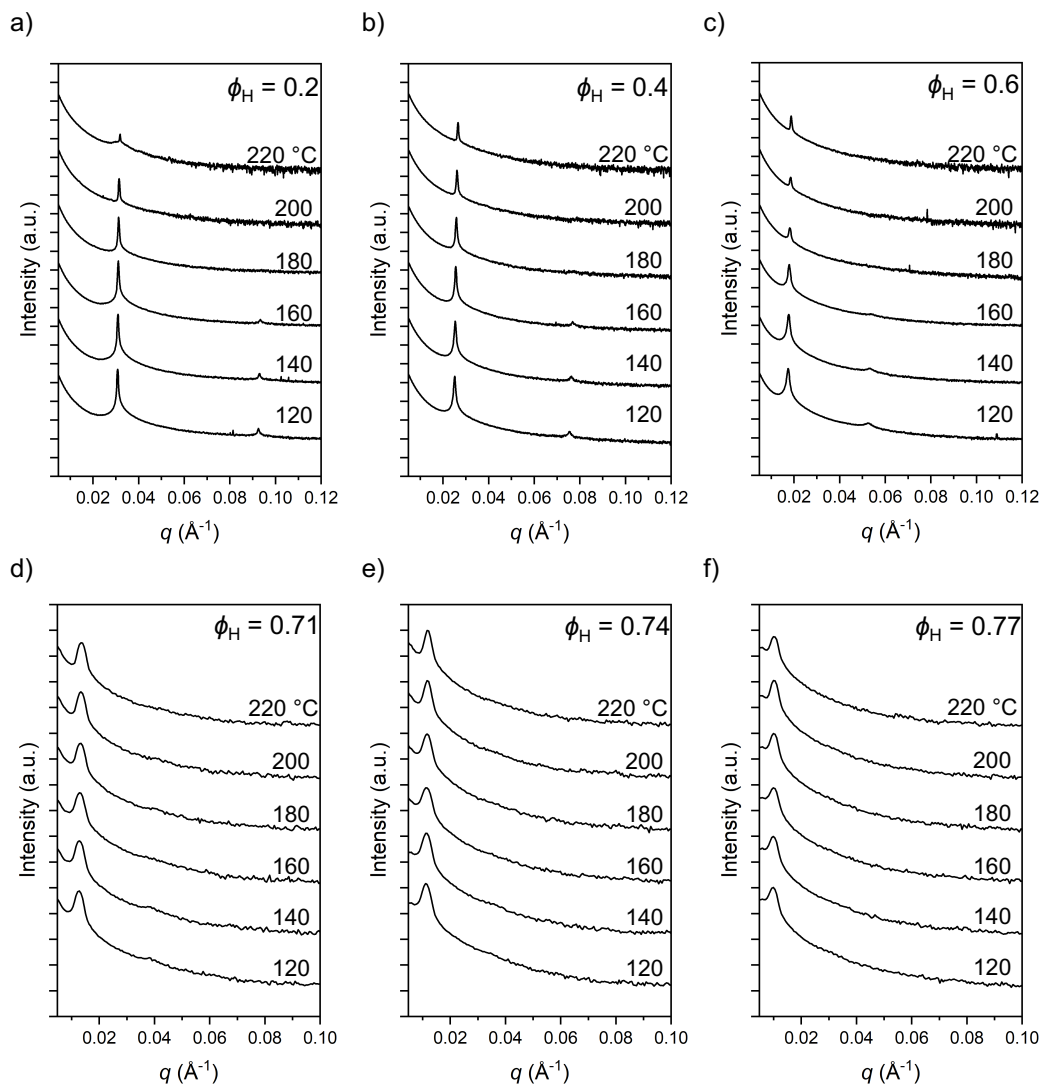

Figure S5. Scattering patterns for T2 at 120, 140, 160, 180, 200 and 220 °C along the volumetrically symmetric isopleth ( $\phi_{\text{POEGMA4.5}} / \phi_{\text{PS}} = 1$ ) at different compositions.

## POEGMA<sub>9.1</sub>-PS/POEGMA<sub>9.1</sub>/PS (T3)

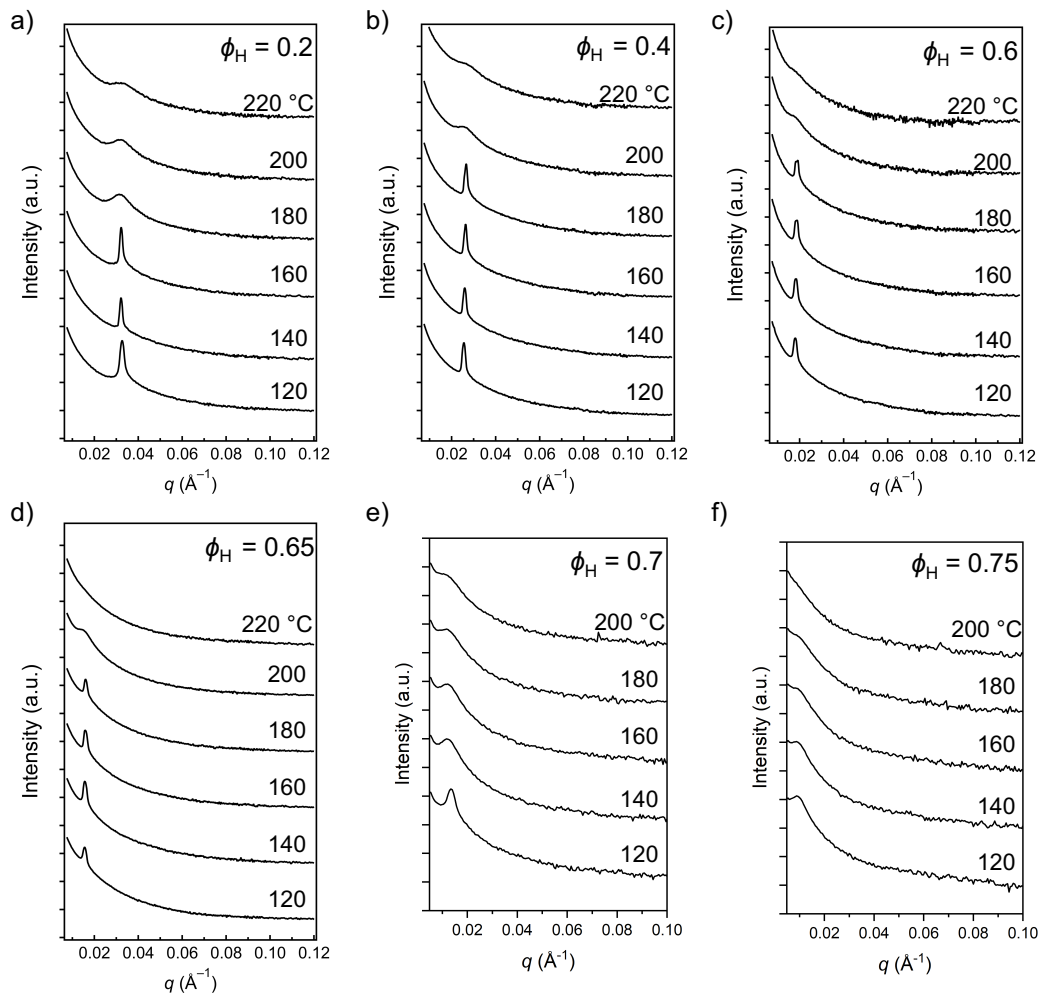

Figure S6. Scattering patterns for T3 at 120, 140, 160, 180, 200 and 220 °C along the volumetrically symmetric isopleth ( $\phi_{\text{POEGMA}9.1} / \phi_{\text{PS}} = 1$ ) at different compositions.

## References

- (1) Zheng, C.; Zhang, B.; S. Bates, F.; P. Lodge, T. Self-Assembly of Partially Charged Diblock Copolymer-Homopolymer Ternary Blends. *Macromolecules* **2022**, *55*, 4766–4775
